# Supplementary material for: Development of Breast Cancer Spheroids to Evaluate Cytotoxic Response to an Anticancer Peptide
Source: MDPI journal article supplement (doi:10.3390/pharmaceutics13111863), 2021-11-04
Supplement: s1 [file s1]

# Supplementary Materials: Development of Breast Cancer Spheroids to Evaluate Cytotoxic Response to an Anticancer Peptide

Marco Cavaco, Patrícia Fraga, Javier Valle, David Andreu, Miguel A.R.B. Castanho and Vera Neves

**Table S1.** Anticancer activity of peptides on 3D cell cultures over 5 days.

| Peptide  | Cancer Cell Lines | IC <sub>50</sub> [μM] |             |             |             |             |
|----------|-------------------|-----------------------|-------------|-------------|-------------|-------------|
|          |                   | Day 1                 | Day 2       | Day 3       | Day 4       | Day 5       |
| PepH3    | MDA-MB-231        | > 100                 | > 100       | > 100       | > 100       | > 100       |
|          | BT-20             | > 100                 | > 100       | > 100       | > 100       | > 100       |
|          | BT-474            | > 100                 | > 100       | > 100       | > 100       | > 100       |
| vCPP2319 | MDA-MB-231        | 69.8 ± 3.34           | 42.8 ± 1.45 | 34.7 ± 1.51 | 25.2 ± 0.94 | 22.1 ± 3.67 |
|          | BT-20             | 62.2 ± 3.76           | 46.5 ± 3.36 | 34.9 ± 2.32 | 28.6 ± 1.23 | 21.3 ± 1.98 |
|          | BT-474            | 87.2 ± 5.37           | 77.9 ± 2.76 | 61.3 ± 2.28 | 51.9 ± 1.72 | 47.9 ± 3.97 |

IC<sub>50</sub> is the concentration causing 50% death of cells.

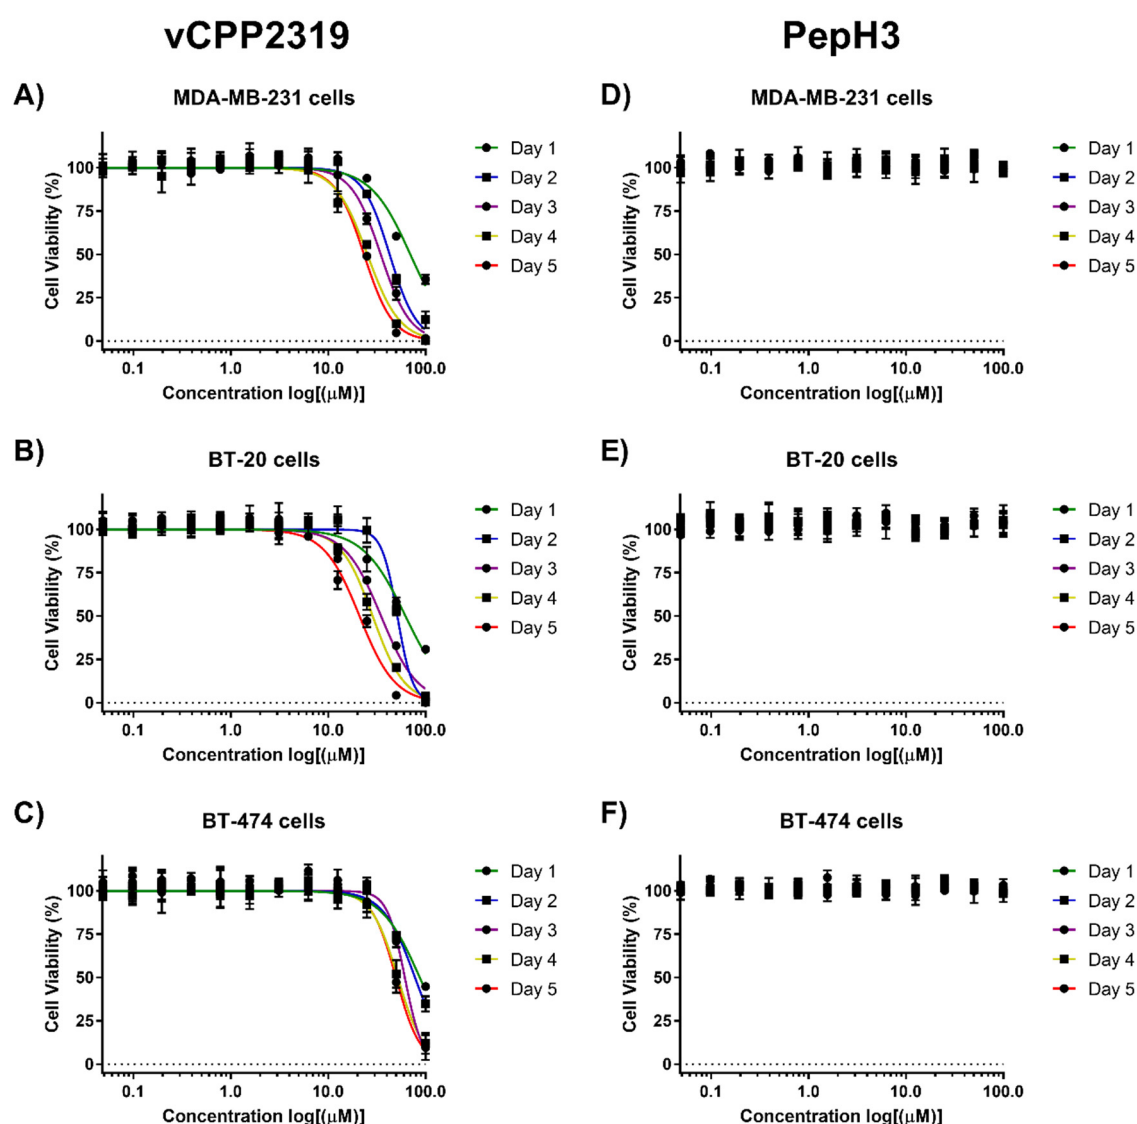

**Figure S1.** In vitro cytotoxicity of peptides towards different cancer cell lines with an incubation up to 5 days. For MDA-MB-231 cells (A and D), an initial cell density of 2 000 cells/well and an incubation of 7 days was used; and for BT-20 (B and E) and BT-474 cells (C and F), an initial cell density of 5 000 cells/well and an incubation of 7 days was used. After spheroid formation, cells were treated with increasing concentrations of vCPP2319 (A–C) and PepH3 (D–F) (0.05–100.0 μM range, in medium) up to 5 days in culturing conditions without medium change, and cell viability was assessed using CellTiter-Blue® Cell Viability Assay. IC<sub>50</sub> values were determined using the GraphPad Prim 7.0 software (GraphPad Software, San Diego, CA, USA) using a log(inhibitor) vs. normalized response. Experiments were performed at least three times on different days using independently grown cell cultures.
