# Supplementary material for: Development of Breast Cancer Spheroids to Evaluate Cytotoxic Response to an Anticancer Peptide
Source: Pharmaceutics. 2021 Nov 4;13(11):1863. doi: 10.3390/pharmaceutics13111863 (PMC8619419; doi:10.3390/pharmaceutics13111863)
Supplement: Supplementary file 1 [file pharmaceutics-13-01863-s001.zip]

Archive with 4 entries (4 files):
- pharmaceutics-1431613-supplementary.pdf
- Video S1.mp4
- Video S2.mp4
- Video S3.mp4
